# Supplementary material for: Self-assembly of triangular polyoxometalate–organic hybrid macroions in mixed solvents
Source: Royal Society of Chemistry journal article supplement (doi:10.1039/c5cc02003d), 2015-01-01
Supplement: c5cc02003d1.pdf [file c5cc02003d1.pdf]

## Supplementary material

# Self-assembly of triangular polyoxometalate-organic hybrid macroions in mixed solvents

Baofang Zhang,<sup>a</sup> Chullikkattil P. Pradeep,<sup>b</sup> Leroy Cronin<sup>\*b</sup> and Tianbo Liu<sup>\*a</sup>

<sup>a</sup> Department of Polymer Science, University of Akron, Akron, Ohio, USA 44325.

<sup>b</sup> West CHEM, Department of Chemistry, University of Glasgow University Avenue, Glasgow, G12 8QQ (UK).

1. CONTIN analysis showing the change of the  $R_h$  distribution of vesicles from hybrid **1** in acetone/water mixed solvent containing 90 vol% acetone at different angle.

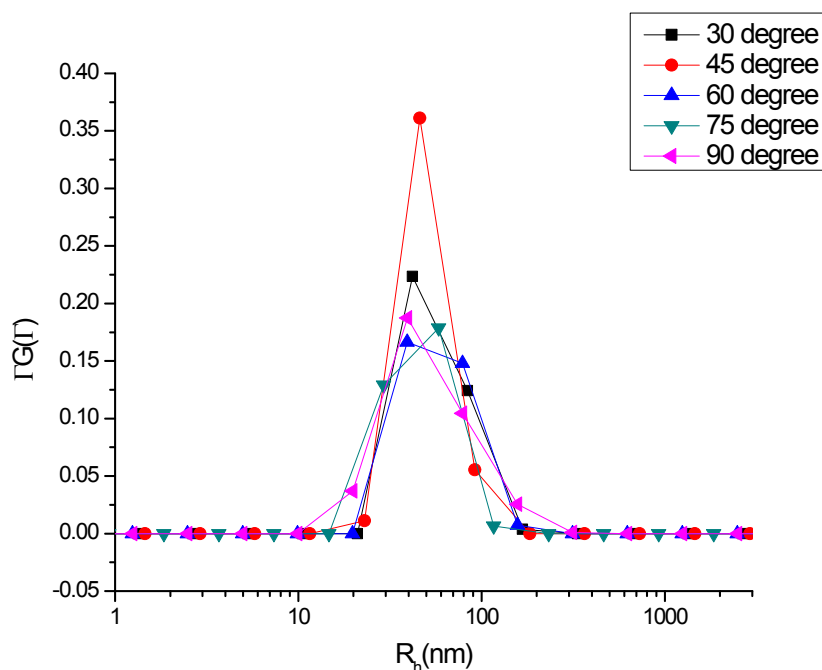

2. CONTIN analysis showing the change of the  $R_h$  distribution of vesicles from hybrid **2** in acetone/water mixed solvent containing 90 vol% acetone at different angle.

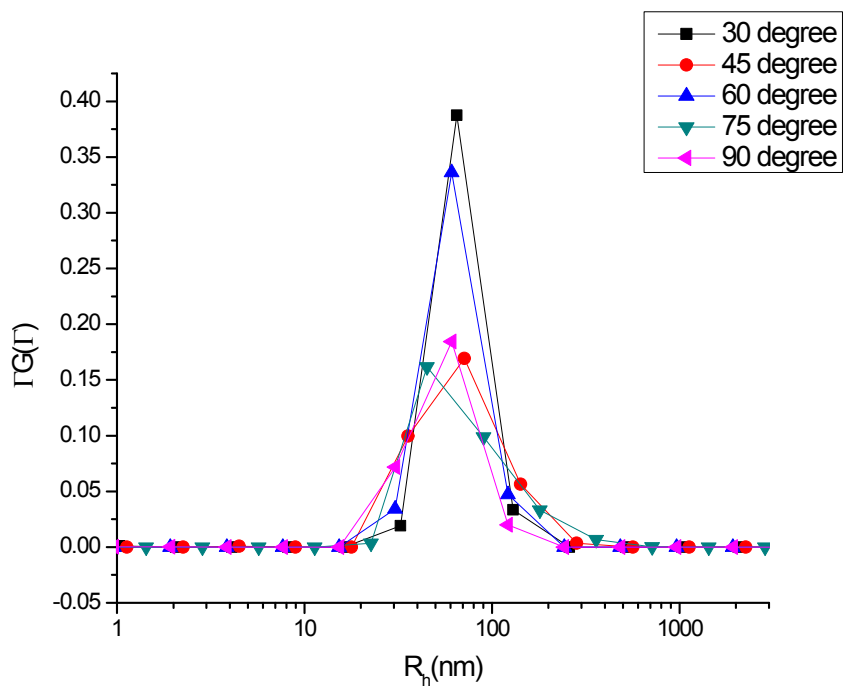

3. CONTIN analysis showing the change of the  $R_h$  distribution of vesicles from hybrid **1** in acetone/water mixed solvent containing 90 vol% acetone at different time.

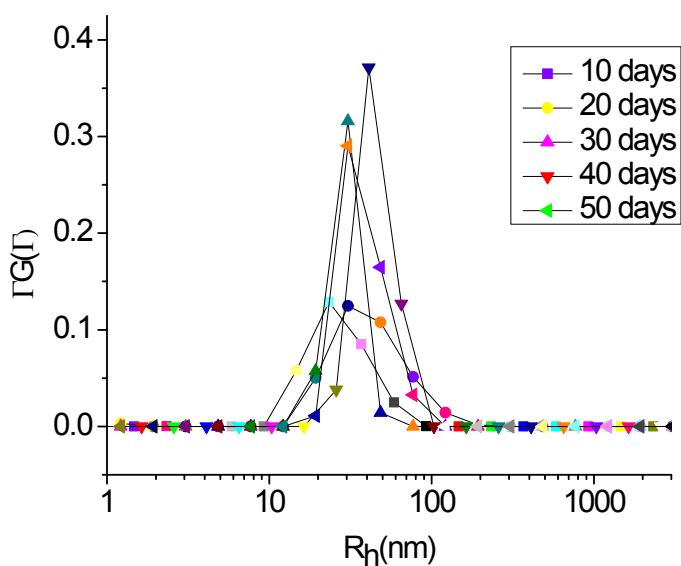

4. For a typical experiment, 5 mg of hybrid **1** or **2** was dissolved in 2 mL of acetonitrile. This solution was then applied to a prepacked, cation-exchange resin column (Amberjet 1200 hydrogen form purchased from Sigma-Aldrich) then rinsed with D.I. water and acetonitrile. An

additional 20-50 mL of acetonitrile was used to elute the column, and the yellow fraction was collected. The post elution of the hybrid macroanions sample was further washed with 5 mL of diethyl ether to remove organic impurities. The final solution was transferred into a glass culture plate and kept in the dark for several days for the solvent to fully evaporate. A fine yellow-colored powder was collected and could be easily dissolved in water for further characterizations.
